# Supplementary material
Source: PubMed Central journal article supplement (PMC122622)

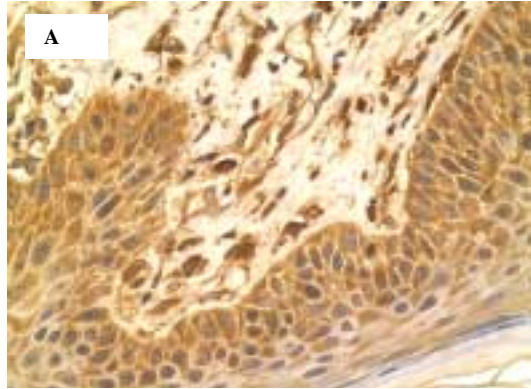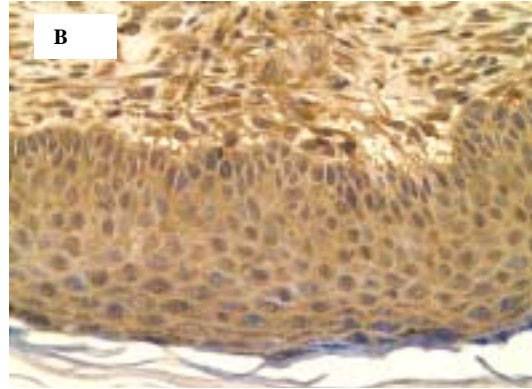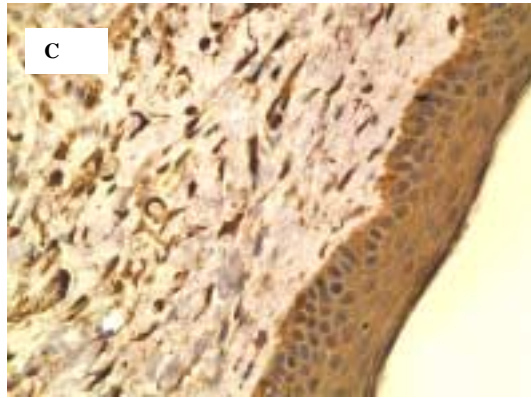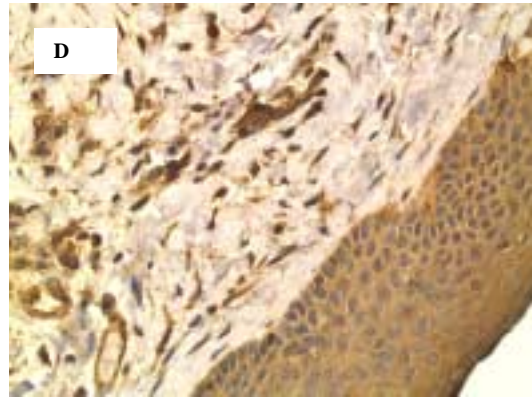

Supplement: pnas_99_6_3908__3.pdf [file pnas_99_6_3908__3.pdf]

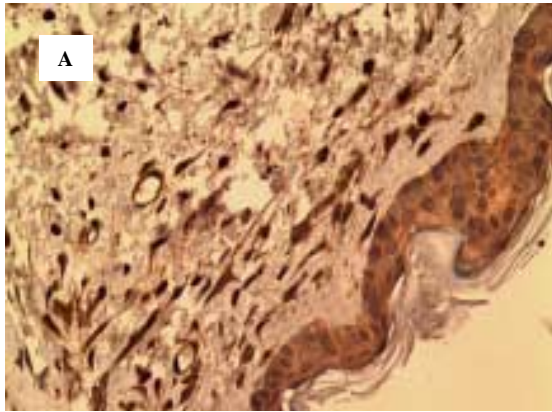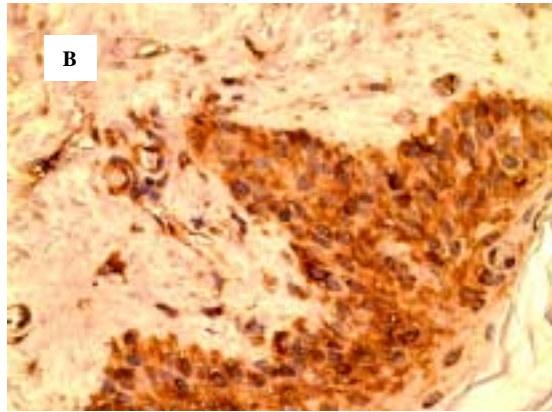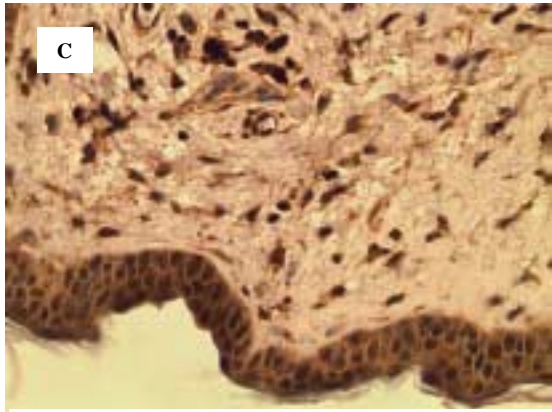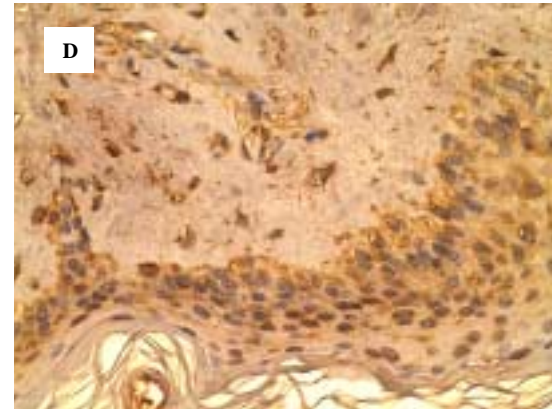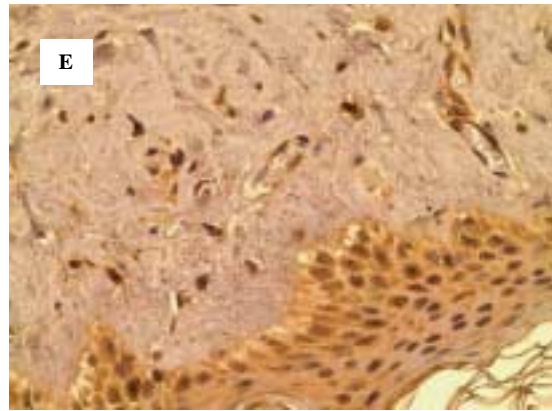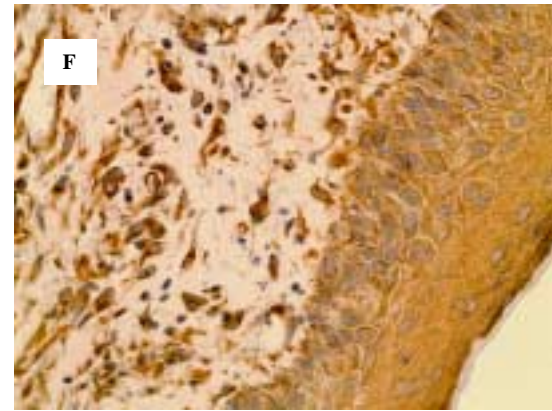

Supplement: pnas_99_6_3908__4.pdf [file pnas_99_6_3908__4.pdf]
